# Supplementary material for: Multiple behaviors for turning performance of Pacific bluefin tuna (Thunnus orientalis)
Source: Oxford University Press journal article supplement (doi:10.1242/jeb.244144), 2023-02-02
Supplement: jeb244144supp.pdf [file jeb244144supp.pdf]

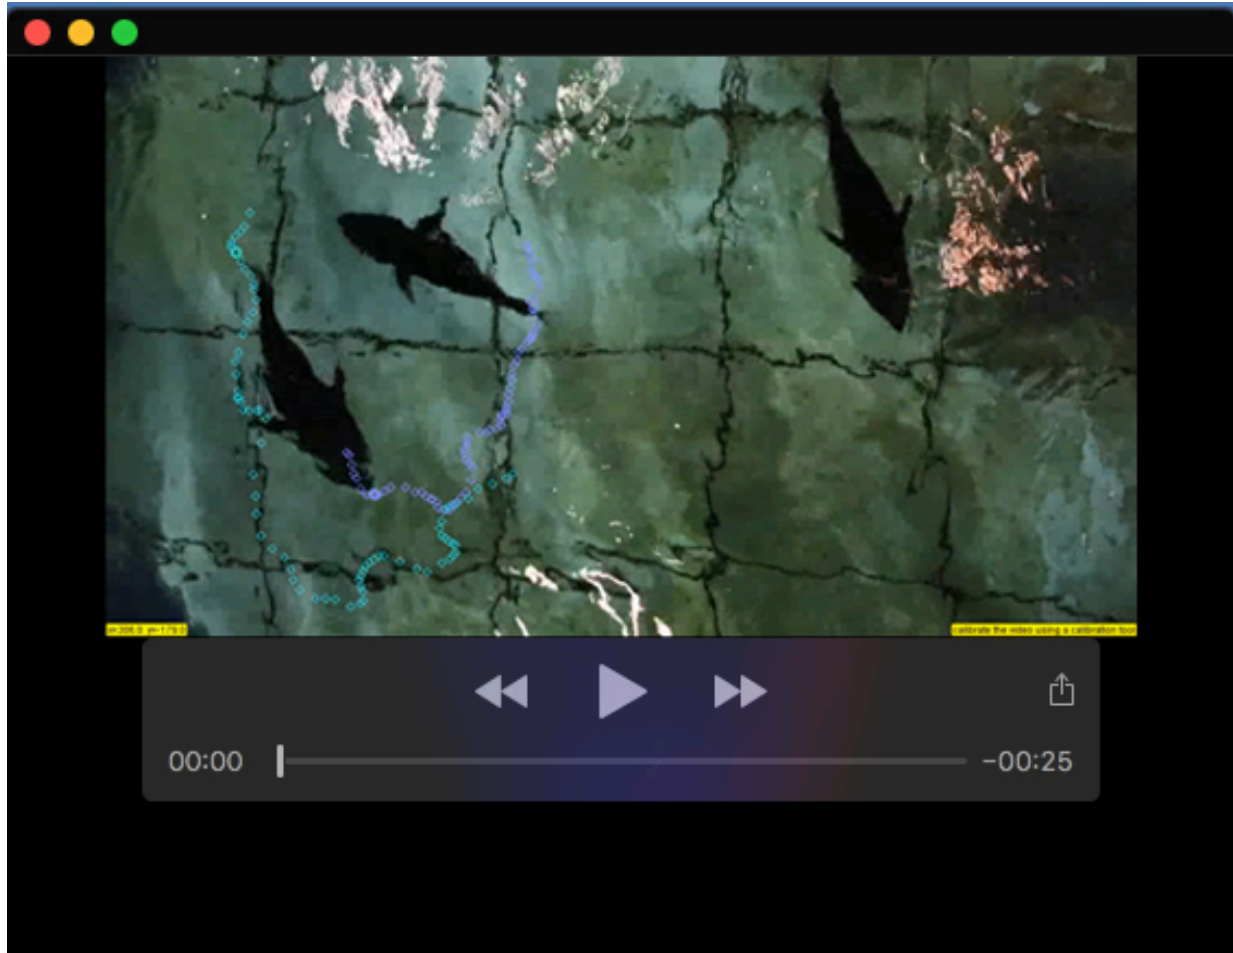

**Movie 1.** Glide turn in which the caudal fin is used as a rudder. The blue diamonds and green diamonds show the sequential positions of rostrum and caudal fin through the turn, respectively.

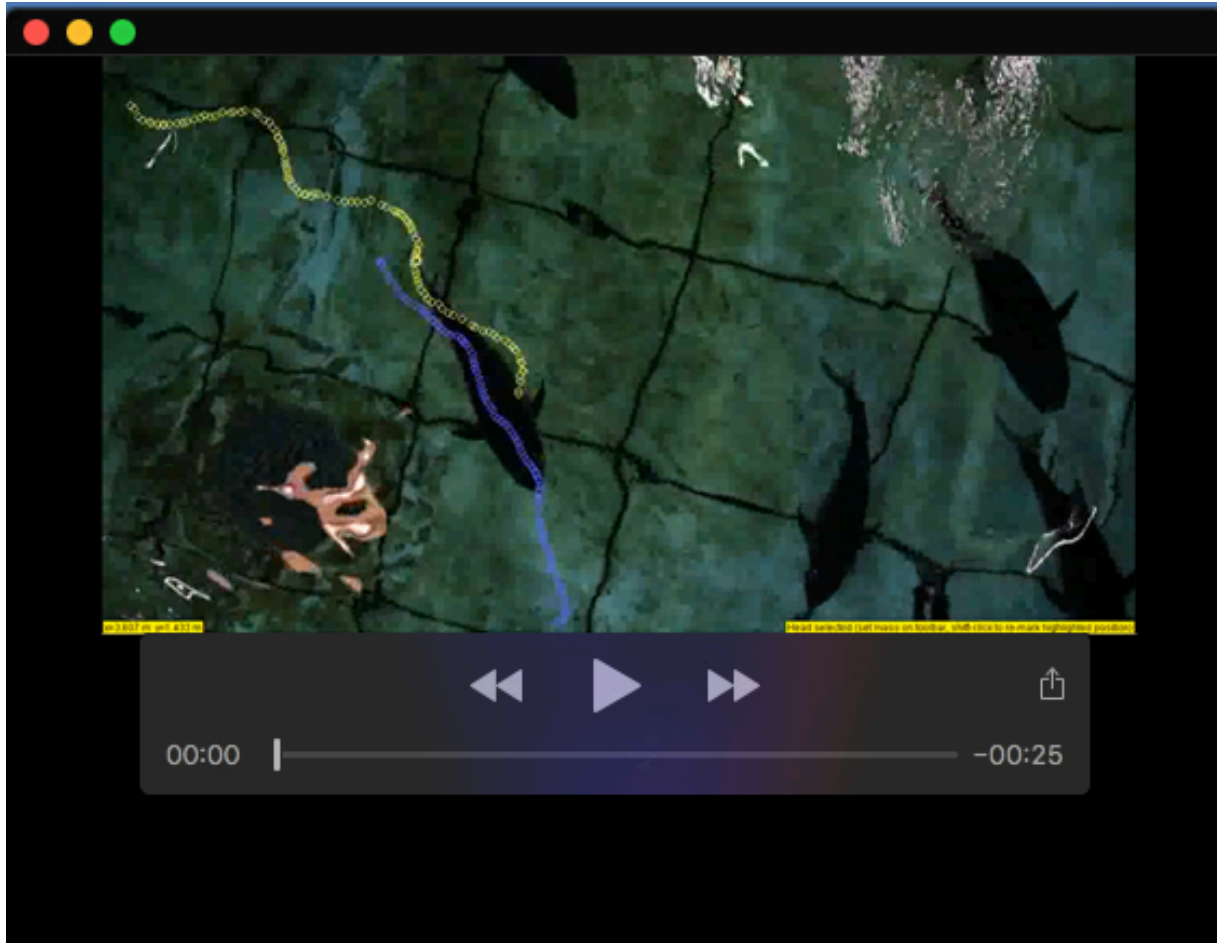

**Movie 2.** Powered turn in which the tuna is using the caudal fin to move through the turn. The blue diamonds and yellow diamonds show the sequential positions of rostrum and caudal fin through the turn, respectively.

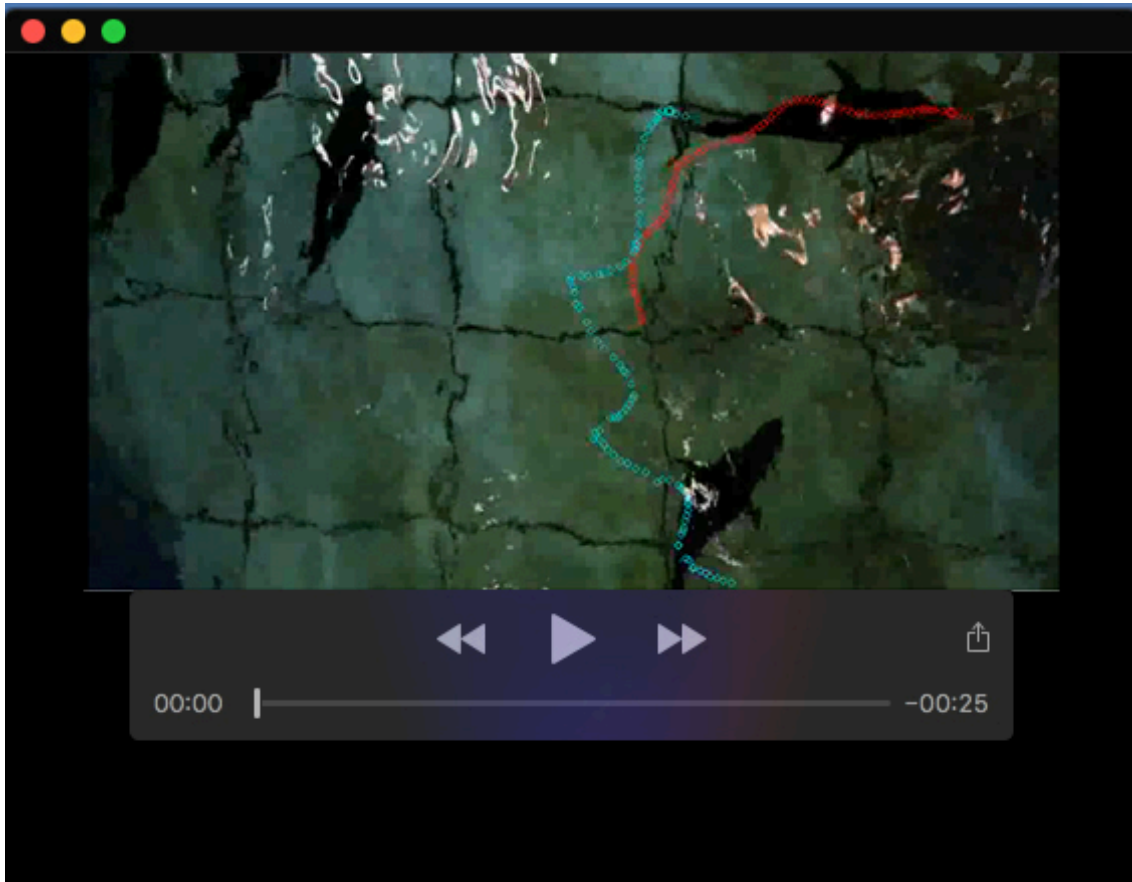

**Movie 3.** Ratchet turn in which the tuna moves the caudal fin is swept through multiple asymmetrical strokes to produce small turns, which are summed to produce a larger global turn. The red diamonds and little blue diamonds show the sequential positions of rostrum and caudal fin through the turn, respectively.
